# Supplementary material for: Preliminary Study: Proteomic Profiling Uncovers Potential Proteins for Biomonitoring Equine Melanocytic Neoplasm
Source: MDPI journal article supplement (doi:10.3390/ani11071913), 2021-06-27
Supplement: s1 [file s1]

**Table S1.** List of unique proteins from differentially expressed proteins analysis under Wilcoxon rank-sum test and multiple testing via false discovery rate (FDR) correction between normal and mild EMN stages

| Protein ID | Protein name                                                                                 | P-value | Adjusted p-value | Normal Horse (N) |      |      |      |      |      |      |      |      |      | Mild EMN Horse (M) |        |        |        |        |        |
|------------|----------------------------------------------------------------------------------------------|---------|------------------|------------------|------|------|------|------|------|------|------|------|------|--------------------|--------|--------|--------|--------|--------|
|            |                                                                                              |         |                  | N-01             | N-02 | N-03 | N-04 | N-05 | N-06 | N-07 | N-08 | N-09 | N-10 | M-01               | M-02   | M-03   | M-04   | M-05   | M-06   |
| A0A286XW26 | Leucine rich glioma inactivated 1 (LGI1)                                                     | 0.021   | 0.048            | 0                | 0    | 0    | 0    | 0    | 0    | 0    | 0    | 0    | 0    | 15.899             | 14.811 | 15.544 | 0      | 0      | 0      |
| A0A5F9DI53 | Sodium/potassium-transporting ATPase subunit alpha (Na <sup>+</sup> /K <sup>+</sup> -ATPase) | 0.005   | 0.048            | 0                | 0    | 0    | 0    | 0    | 0    | 0    | 0    | 0    | 0    | 15.277             | 15.507 | 14.661 | 0      | 0      | 14.693 |
| G1NTJ3     | WD repeat domain 78 (WDR78)                                                                  | 0.021   | 0.048            | 0                | 0    | 0    | 0    | 0    | 0    | 0    | 0    | 0    | 0    | 14.956             | 14.519 | 13.852 | 0      | 0      | 0      |
| G1P1V8     | N(alpha)-acetyltransferase 16 (NAA16)                                                        | 0.021   | 0.048            | 0                | 0    | 0    | 0    | 0    | 0    | 0    | 0    | 0    | 0    | 11.422             | 16.212 | 12.405 | 0      | 0      | 0      |
| G1PX76     | Storkhead box 1 (STOX1)                                                                      | 0.021   | 0.048            | 0                | 0    | 0    | 0    | 0    | 0    | 0    | 0    | 0    | 0    | 14.334             | 13.505 | 15.484 | 0      | 0      | 0      |
| G1Q3S1     | Phospholipid phosphatase 6 (PLPP6)                                                           | 0.005   | 0.048            | 0                | 0    | 0    | 0    | 0    | 0    | 0    | 0    | 0    | 0    | 14.522             | 12.615 | 15.449 | 15.602 | 0      | 0      |
| G1QEM5     | WD repeat domain 90 (WDR90)                                                                  | 0.021   | 0.048            | 0                | 0    | 0    | 0    | 0    | 0    | 0    | 0    | 0    | 0    | 15.120             | 14.146 | 16.354 | 0      | 0      | 0      |
| G1TD38     | Centriolar coiled-coil protein 110 (CCP110)                                                  | 0.021   | 0.048            | 0                | 0    | 0    | 0    | 0    | 0    | 0    | 0    | 0    | 0    | 13.596             | 12.926 | 17.573 | 0      | 0      | 0      |
| G1TDZ5     | Tumor suppressor candidate 1 (TUSC1)                                                         | 0.021   | 0.048            | 0                | 0    | 0    | 0    | 0    | 0    | 0    | 0    | 0    | 0    | 18.166             | 16.543 | 18.888 | 0      | 0      | 0      |
| H0UXW0     | Four and a half LIM domains 5 (FHL5)                                                         | 0.021   | 0.048            | 0                | 0    | 0    | 0    | 0    | 0    | 0    | 0    | 0    | 0    | 15.491             | 13.558 | 0      | 0      | 15.136 | 0      |
| H0V4F2     | Plexin D1 (PLXND1)                                                                           | 0.021   | 0.048            | 0                | 0    | 0    | 0    | 0    | 0    | 0    | 0    | 0    | 0    | 14.860             | 14.946 | 14.838 | 0      | 0      | 0      |
| H0VKA5     | Astrotactin 1 (ASTN1)                                                                        | 0.021   | 0.048            | 0                | 0    | 0    | 0    | 0    | 0    | 0    | 0    | 0    | 0    | 14.963             | 13.275 | 9.488  | 0      | 0      | 0      |
| H0W6F7     | Dishevelled segment polarity protein 2 (DVL2)                                                | 0.021   | 0.048            | 0                | 0    | 0    | 0    | 0    | 0    | 0    | 0    | 0    | 0    | 11.638             | 12.549 | 0      | 14.567 | 0      | 0      |
